# Supplementary material for: Polyvinylpyrrolidone-assisted synthesis of highly water-stable cadmium-based metal–organic framework nanosheets for the detection of metronidazole
Source: Royal Society of Chemistry journal article supplement (doi:10.1039/d1ra05349c), 2021-01-01
Supplement: d1ra05349c1.pdf [file d1ra05349c1.pdf]

## Supporting Information

### Polyvinylpyrrolidone-assisted synthesis of a high water-stable Cadmium-based Metal-Organic Framework nanosheets for the detection of metronidazole

Guoxu Qin<sup>§ a,b</sup>, Duojun Cao<sup>§ a,b</sup>, Xinjun Wan<sup>a,b</sup>, Xinyun Wang<sup>a,b</sup>, and Yaqiong Kong<sup>\*a,b</sup>

<sup>a</sup>College of Chemistry and materials engineering, Chaohu University, Chaohu, China;

<sup>b</sup>institute of novel functional materials and fine Chemicals, Chaohu University, Chaohu, China

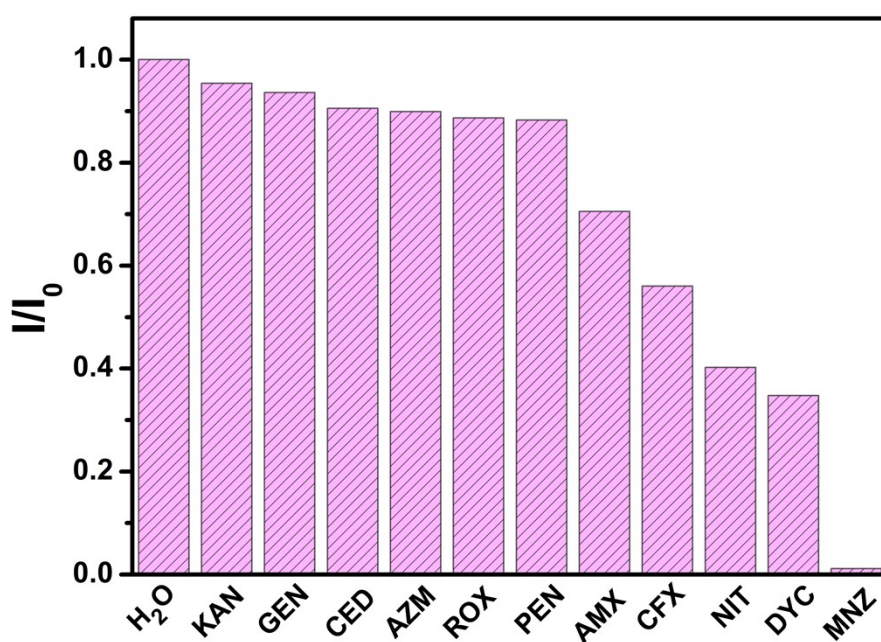

**Figure S1.** fluorescence intensity ratio ( $I/I_0$ ) of Cd-MOF suspension after adding various antibiotics,  $I_0$  represents intensity of Cd-MOF nanosheets in water solution,  $I$  represents intensity of Cd-MOF nanosheets with antibiotics.

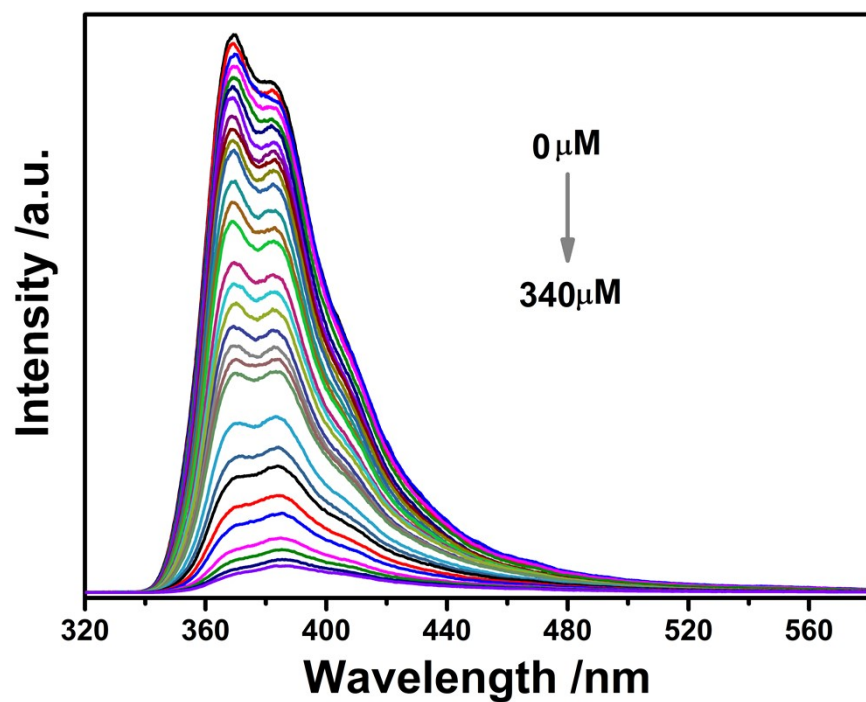

**Figure S2.** Concentration-dependent fluorescence spectra of bulk Cd-MOF with various concentrations of fluoride.

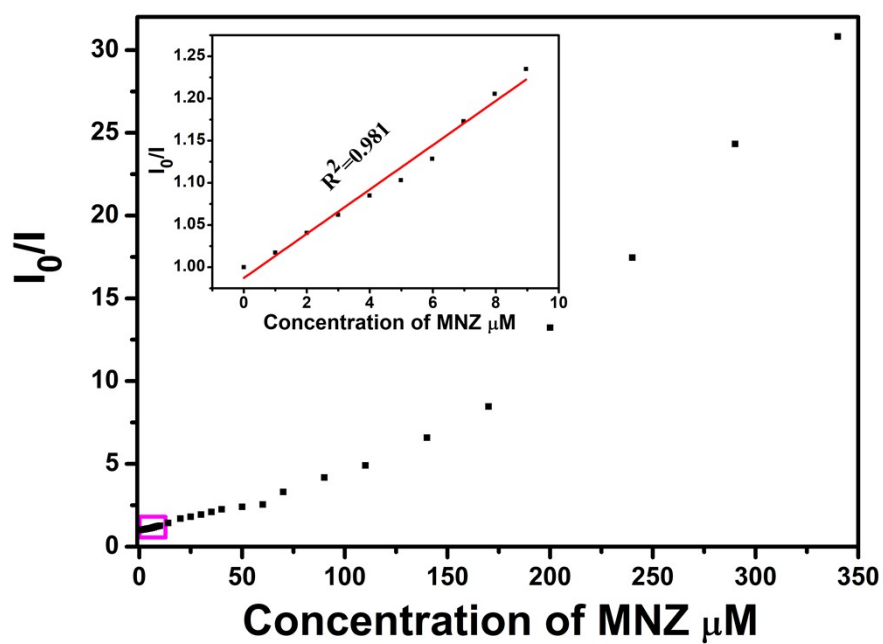

**Figure S3.** The correlation curve between the fluorescence intensity ratio ( $I_0/I$ ) of bulk Cd-MOF and the concentration of MNZ: inset: the corresponding linear relation in the low concentration region.

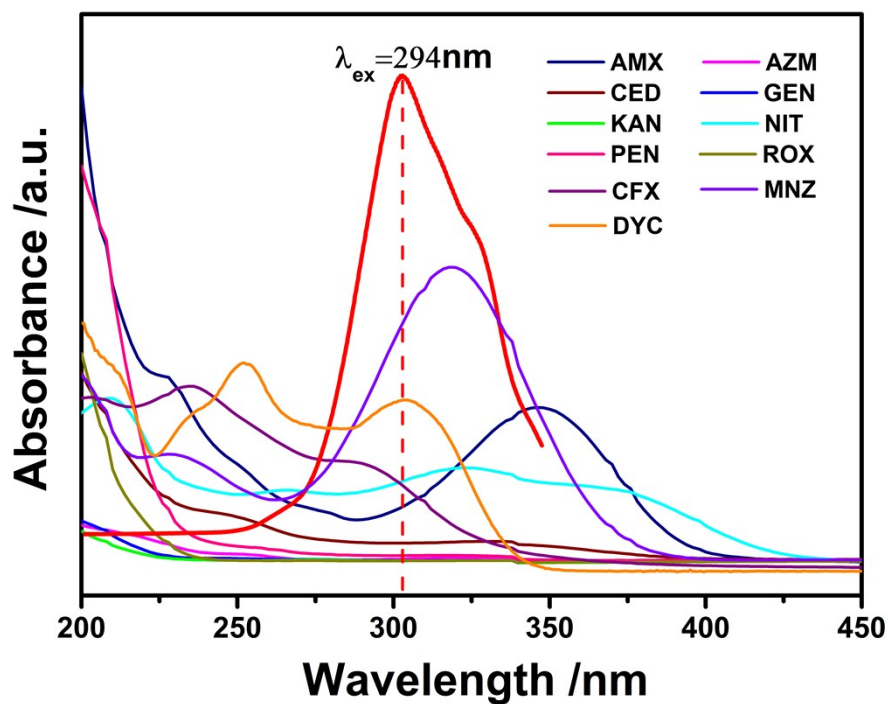

Figure S4. UV-vis absorption spectra of each antibiotic and the normalized excitation spectrum.

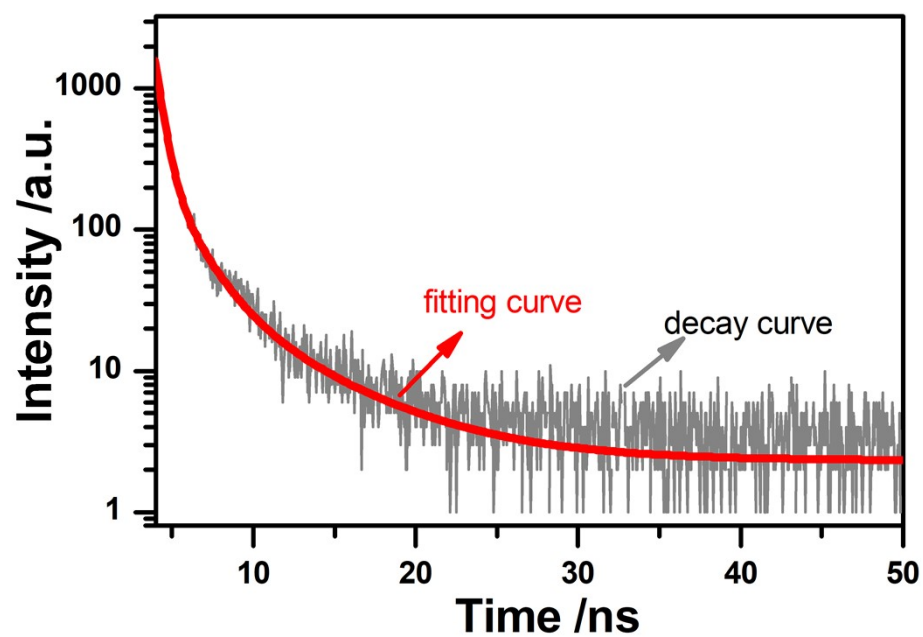

Figure S5. Time-resolved fluorescence decay of Cd-MOF nanosheets and the corresponding fitting curve.
